# Supplementary material
Source: MDPI journal article supplement (https://www.mdpi.com/2073-445X/8/8/115)
Supplement: s1 [file s1]

**Supplementary Material Table S3.** Key public institutions at the national, regional and county level with a mandate relevant to LDN

|          |                                            | Ministry of Environment and Forestry                                                                    | Ministry of Lands and Physical Planning                                 | Ministry of Agriculture, Livestock, Fisheries and Irrigation | Ministry of Devolution and ASALs                   |                                       | Ministry of Tourism and Wildlife         | Ministry of Water and Sanitation                | Ministry of Mining                                           | Ministry of East African Community and Regional Development | The National Treasury            |
|----------|--------------------------------------------|---------------------------------------------------------------------------------------------------------|-------------------------------------------------------------------------|--------------------------------------------------------------|----------------------------------------------------|---------------------------------------|------------------------------------------|-------------------------------------------------|--------------------------------------------------------------|-------------------------------------------------------------|----------------------------------|
| NATIONAL | Policy                                     | - Kenya Meteorological Department<br>- Directorate of Environment<br>- Directorate of Natural Resources | Department of Physical Planning                                         |                                                              | Devolution Department                              | ASAL Department                       |                                          |                                                 | - Directorate of Mines<br>- Directorate of Geological Survey |                                                             | State Department for Planning    |
|          |                                            | Climate Change Secretariat                                                                              | National Land Commission                                                | Agricultural Sector Coordination Unit                        | Intergovernmental Relations Technical Committee    | ASAL Transformation Secretariat       |                                          |                                                 |                                                              |                                                             | Vision 2030 Delivery Secretariat |
|          |                                            | National Climate Change Steering Committee (NCCSC)                                                      | National Technical Committee<br>- Spatial Planning<br>- Land Use Policy | Inter-Ministerial Coordination Committee                     | Council of County Governors                        | ASAL Cabinet Sub-Committee            |                                          |                                                 |                                                              |                                                             |                                  |
|          |                                            | State Department Climate Change Units                                                                   | National Council<br>- Land Use Policy<br>- Physical Planning            |                                                              | National and County Government Coordinating Summit | ASAL Inter-Ministerial Committee      |                                          |                                                 |                                                              |                                                             |                                  |
|          |                                            |                                                                                                         |                                                                         |                                                              | Intergovernmental Consultative Sectoral Forum      |                                       |                                          |                                                 |                                                              |                                                             |                                  |
|          | Multi-stakeholder Forum                    | National Climate Change Council                                                                         |                                                                         |                                                              |                                                    | ASAL Stakeholders' Forum (national)   |                                          |                                                 | Mining Forum                                                 |                                                             |                                  |
|          | Regulatory                                 | National Environmental Management Authority                                                             |                                                                         | Agriculture and Food Authority                               |                                                    | National Drought Management Authority |                                          | Water Resources Authority                       | Mineral Rights Board                                         |                                                             |                                  |
|          |                                            | National Environment Tribunal                                                                           |                                                                         |                                                              |                                                    |                                       |                                          | Water Services Regulatory Board                 |                                                              |                                                             |                                  |
|          |                                            | Environment and Land Court                                                                              |                                                                         |                                                              |                                                    |                                       |                                          | Water Tribunal                                  |                                                              |                                                             |                                  |
|          | Research/ Training                         | Kenya Forestry College                                                                                  |                                                                         | Kenya Agricultural & Livestock Research Organization         |                                                    | National Council on Nomadic Education | Wildlife Research and Training Institute |                                                 |                                                              |                                                             |                                  |
|          |                                            | Kenya Forestry Research Institute                                                                       |                                                                         |                                                              |                                                    | Northern Kenya Education Trust        |                                          |                                                 |                                                              |                                                             |                                  |
|          | Service provision/ Coordination/ Technical | Kenya Water Towers Agency                                                                               | Kenya Institute of Surveying and Mapping                                | Agricultural Development Corporation                         |                                                    |                                       | Kenya Wildlife Service                   | National Water Harvesting and Storage Authority | National Mining Corporation                                  |                                                             |                                  |
|          |                                            | Kenya Forest Service                                                                                    |                                                                         | National Irrigation Board                                    |                                                    |                                       |                                          |                                                 | Minerals and Metal Commodity Exchange                        |                                                             |                                  |

|          |                                          | Ministry of Environment and Forestry | Ministry of Lands and Physical Planning                      | Ministry of Agriculture, Livestock, Fisheries and Irrigation | Ministry of Devolution and ASALs                                                                      |                                   | Ministry of Tourism and Wildlife                         | Ministry of Water and Sanitation  | Ministry of Mining         | Ministry of East African Community and Regional Development | The National Treasury |
|----------|------------------------------------------|--------------------------------------|--------------------------------------------------------------|--------------------------------------------------------------|-------------------------------------------------------------------------------------------------------|-----------------------------------|----------------------------------------------------------|-----------------------------------|----------------------------|-------------------------------------------------------------|-----------------------|
| REGIONAL | Multi-stakeholder Forum                  | Forest Conservation Committee        |                                                              |                                                              |                                                                                                       |                                   |                                                          | Basin Water Resources Committee   |                            |                                                             |                       |
|          | Service provision/Coordination/Technical |                                      |                                                              |                                                              |                                                                                                       |                                   |                                                          | Water Works Development Agencies  |                            | 6 Regional Development Authorities                          |                       |
| COUNTY   | Legislative                              |                                      |                                                              |                                                              | County Assemblies                                                                                     |                                   |                                                          |                                   |                            |                                                             |                       |
|          | Multi-stakeholder Forum                  | County Environment Committee         |                                                              |                                                              | Village council                                                                                       | ASAL Stakeholders' Forum (county) |                                                          |                                   |                            |                                                             |                       |
|          | Service provision/Coordination/Technical | County Climate Change Units          | County Physical Planning Committee                           |                                                              | Citizens' Service Centre (at the county; the sub-county; the Ward; and any other decentralized level) |                                   | County Wildlife Conservation and Compensation Committees | Water service providers           | Artisanal Mining Committee |                                                             |                       |
|          |                                          |                                      | County Technical Implementation Committees (Land Use Policy) |                                                              | County executive committee                                                                            |                                   | Community wildlife associations                          |                                   |                            |                                                             |                       |
|          |                                          |                                      | Community land management committee                          |                                                              | County Development Board                                                                              |                                   |                                                          |                                   |                            |                                                             |                       |
|          |                                          |                                      |                                                              |                                                              | Office of Village Administrator                                                                       |                                   |                                                          |                                   |                            |                                                             |                       |
|          |                                          |                                      |                                                              |                                                              | Office of Ward Administrator                                                                          |                                   |                                                          |                                   |                            |                                                             |                       |
|          | USERS                                    | Community Forest Associations        | Registered community                                         | Irrigation Water Users Associations                          |                                                                                                       |                                   |                                                          | Water resource users associations |                            |                                                             |                       |
